# Supplementary material
Source: PubMed Central journal article supplement (PMC3150896)
Supplement: 1106453108_pnas.1106453108_SI.pdf [file 1106453108_pnas.1106453108_SI.pdf]

# Supporting Information

Lin et al. 10.1073/pnas.1106453108

## SI Materials and Methods

**Circular Dichroism.** Utrophin constructs were prepared in PBS, at 20- $\mu$ M concentration. Proteins were clarified by ultracentrifugation at  $100,000 \times g$  for 15 min at 4 °C prior to sample preparation. CD spectra were acquired using a JASCO J-815 spectrophotometer and a temperature-jacketed spectral cell with a path length of 0.1 cm. Spectra were taken from 200 to 260 nm at intervals of 1 nm, bandwidth of 1 nm, and a 1-s averaging time with temperature set at 25 °C. Data were analyzed assuming that the CD spectrum is a linear combination of the contributions from  $\alpha$ -helix,  $\beta$ -sheet, and random coil.

$$E(\lambda) = x_{\alpha}E_{\alpha}(\lambda) + x_{\beta}E_{\beta}(\lambda) + x_R R_R(\lambda). \quad [S1]$$

The unit of E is molar ellipticity ( $\text{deg}^{\circ} \text{cm}^2 \text{dmol}^{-1}$ ) per residue. The percent  $\alpha$ -helix of the sample is similar between native Utr261, unlabeled V136C/L222C and N-(1-oxyl-2,2,6,6-tetramethyl-4-piperidiny)maleimide (MSL)-labeled V136C/L222C.

1. Moores CA, Kendrick-Jones J (2000) Biochemical characterisation of the actin-binding properties of utrophin. *Cell Motil Cytoskeleton* 46:116–128.
2. Winder SJ, et al. (1995) Utrophin actin binding domain: Analysis of actin binding and cellular targeting. *J Cell Sci* 108:63–71.

This indicated that the presence of the mutation or the attachment of MSL did not significantly alter the secondary structure of the CH domains (Fig. S1).

**Cosedimentation Assay.** Binding affinities of utrophin constructs were determined by mixing 25  $\mu$ M with a range of actin concentrations (0–70  $\mu$ M), then centrifuging at  $100,000 \times g$  for 20 min at 4 °C. Concentrations of free utrophin ( $U_F$ ) were determined using a Bradford assay using a BSA standard (Biorad). Regression analysis was done fitting the data to  $X_b = A/(A + K_d)$ , where  $A$  is concentration of free actin protomers,  $X_b$  is the fraction of actin protomers with bound utrophin, and  $K_d$  is the dissociation constant. The  $K_d$  values determined for native Utr261, unlabeled V136C/L222C, and MSL-labeled V136C/L222C (Fig. S2) were very similar and within the range of  $K_d$  previously reported for Utr261 (1–3). Thus, the presence of the mutation or the attachment of MSL did not affect the affinity of the CH domains to bind to actin.

3. Rybakova IN, Humston JL, Sonnemann KJ, Ervasti JM (2006) Dystrophin and utrophin bind actin through distinct modes of contact. *J Biol Chem* 281:9996–10001.

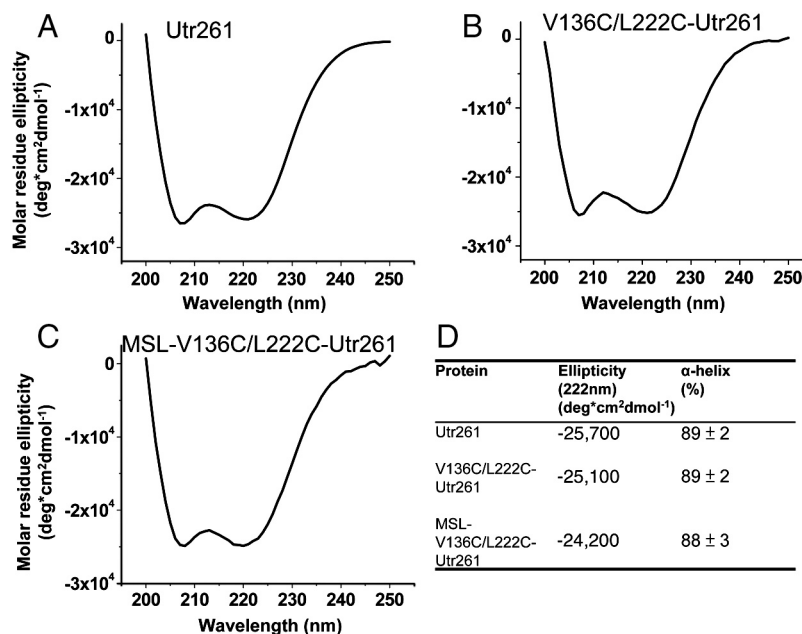

**Fig. S1.** CD spectrum of (A) Utr261, (B) double mutant V136C/L222C, and (C) MSL-labeled V136C/L222C. (D) Percent  $\alpha$ -helix determined from molar ellipticity at 222 nm with SD. Neither the presence of the double-cysteine mutations nor the MSL labeling disrupted the secondary structure.
